# Supplementary material for: One-step fabrication of an ultralong zinc octaethylporphyrin nanowire network with high-performance photoresponse
Source: Royal Society of Chemistry journal article supplement (doi:10.1039/c2tc00422d), 2012-11-26
Supplement: c2tc00422d.pdf [file c2tc00422d.pdf]

Supporting Information for:

**One-step fabrication of ultralong zinc octaethylporphyrin nanowire network  
with high-performance photoresponse**

Feng-Xia Wang, Yong-Qiang Liu, Hao-Di Wu, Yan Xiao, Ge-Bo Pan\*

*Suzhou Institute of Nano-tech and Nano-bionics, Chinese Academy of Sciences,  
215123 Suzhou, P. R. China*

**Experimental section:**

In a typical experiment, ZnOEP powder (Aldrich) was dissolved into a mixed solvent of chloroform, octane, and propylene glycol methyl ether acetate (PGMEA) at a concentration of 0.5 mg/ml. The volume ratio of  $V_{\text{chloroform}}:V_{\text{octane}}:V_{\text{PGMEA}}$  was 2:1:1. A drop of ZnOEP solution was then directly dropped onto the heavily-doped Si substrate. After the solvent evaporation, network of single-crystal nanowire of ZnOEP was formed. To remove the solvent thoroughly, the nanowire was post-annealed at 150 °C for 30 min. The morphology and crystalline structures were then characterized by scanning electron microscopy (SEM, Quanta 400 FEG), transmission electron microscopy (TEM, Tecnai G2 F20 S-Twin), X-ray diffraction (XRD, Bruker D8 Advance X-Ray Diffractometer), and Fourier-transform infrared (FTIR, Thermo Fisher Scientific FTIR 6700).

The photodetectors were constructed in bottom-connected configuration. The finger electrodes with the length of 200  $\mu\text{m}$ , the width of 20  $\mu\text{m}$  and the distance of 20  $\mu\text{m}$ , were fabricated by the photolithography and electron beam deposition of Au on the  $\text{SiO}_2/\text{Si}$  substrate. The 25  $\mu\text{l}$  ZnOEP solution (0.5mg/ml, the mixed solvent volume ratio of  $V_{\text{chloroform}}:V_{\text{octane}}:V_{\text{PGMEA}}$  was 2:1:1 ) was directly deposited on 5mm $\times$ 5mm the Au electrodes deposited  $\text{SiO}_2/\text{Si}$  substrate. The solvent was allowed to evaporate in air. To remove the solvent thoroughly and enhance the contact the nanowire and the Au electrodes, the device was also post-annealed at 150 °C for 30 min. Current-voltage characteristics of the devices were recorded with Keithley 4200 SCS and SUSS PM8 probe station in a clean and shielded box at room temperature. A Xenon lamp was used as the white light source with different intensity. All measurements were carried

out at ambient conditions.

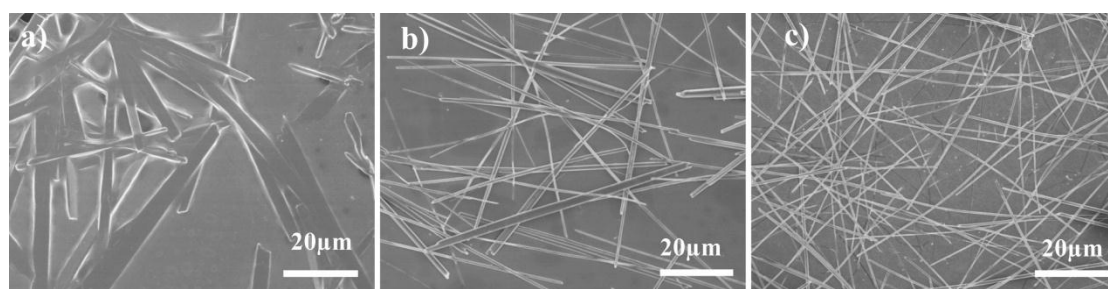

**Figure S1.** SEM images of ZnOEP nanowires fabricated by using different solvents: (a) chloroform; (b) chloroform + octane ( $V_{\text{chloroform}}:V_{\text{octane}}=3:1$ ); (c) chloroform + octane ( $V_{\text{chloroform}}:V_{\text{octane}}=1:1$ ).

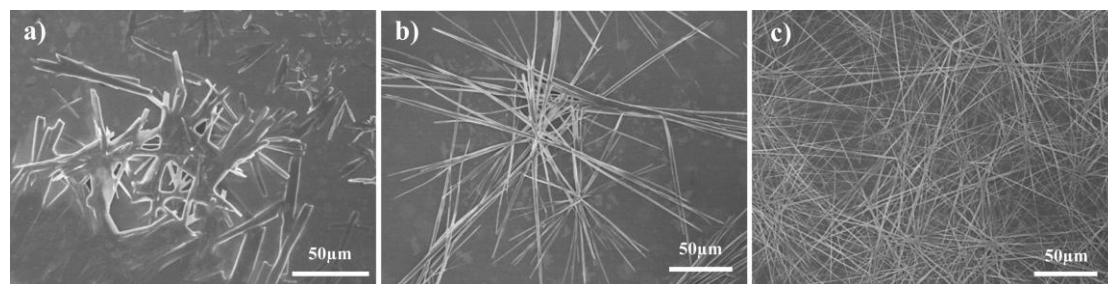

**Figure S2.** (a) chloroform; (b) chloroform + PGMEA ( $V_{\text{chloroform}}:V_{\text{PGMEA}}=3:1$ ); (c) chloroform + PGMEA ( $V_{\text{chloroform}}:V_{\text{PGMEA}}=1:3$ ).

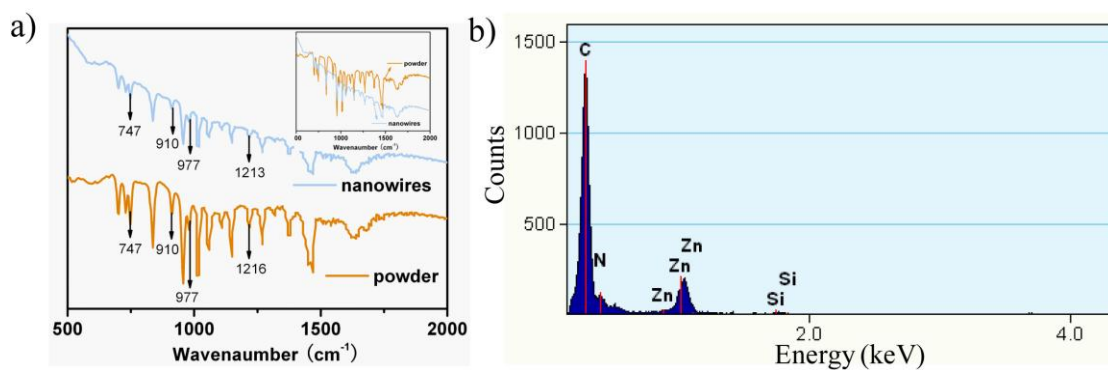

**Figure S3.** (a) FT-IR spectra of nanowire network and source powder of ZnOEP. (b) EDX spectrum of ZnOEP nanowire network.

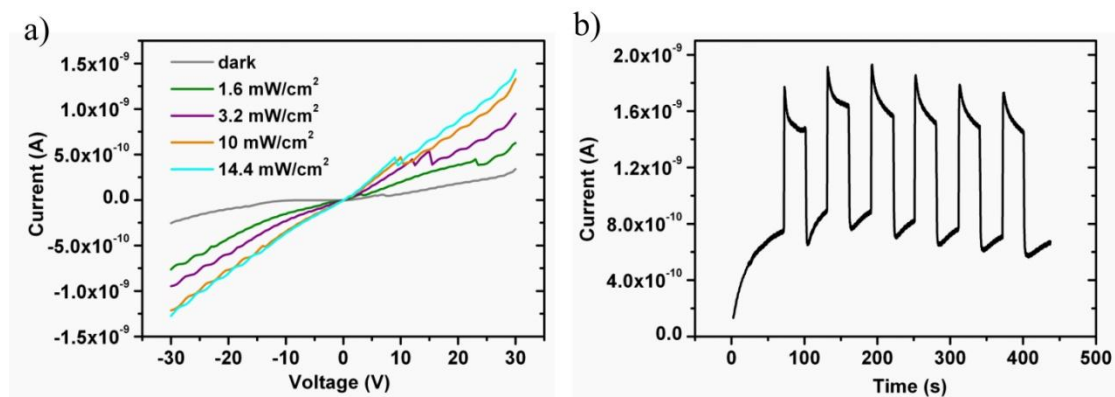

**Figure S4.** (a) Dark current and photocurrents at different incident power densities; (b) On/off switching of the device (light density:  $14.4 \text{ mW/cm}^2$ , bias voltage: 20V). The device was fabricated by thermal vapor deposition in a high-vacuum system. The base pressure was less than  $5 \times 10^{-4} \text{ Pa}$ . The thickness of ZnOEP film was  $\sim 50 \text{ nm}$ .

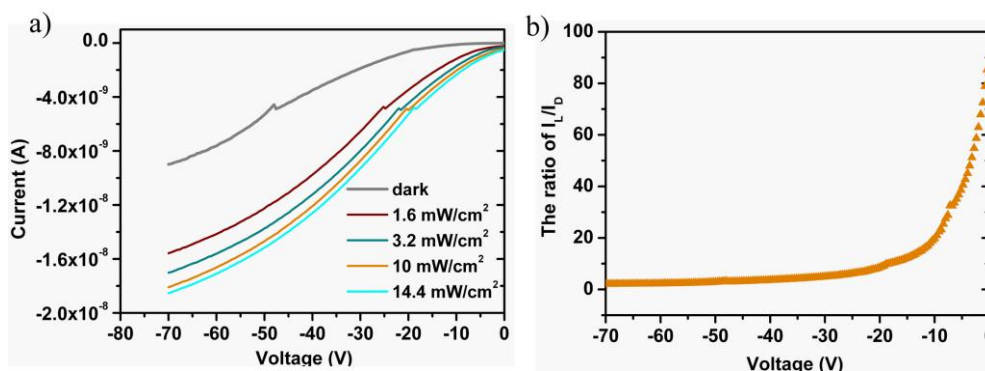

**Figure S5.** (a) Transfer characteristics of devices based on ZnOEP film in dark and under illumination. (b) The ratios of  $I_{SD}$  measured at different gate voltage under illumination of  $14.4 \text{ mW/cm}^2$ . The  $V_{DS}$  is -40 V. The device was fabricated by thermal vapor deposition in a high-vacuum system. The base pressure was less than  $5 \times 10^{-4} \text{ Pa}$ . The thickness of ZnOEP film was  $\sim 50 \text{ nm}$ .
